# Supplementary material
Source: PubMed Central journal article supplement (PMC6080833)
Supplement: mmc1.pdf [file mmc1.pdf]

**Supplemental Data**

**Argininosuccinate Lyase Deficiency Causes  
an Endothelial-Dependent Form of Hypertension**

**Jordan Kho, Xiaoyu Tian, Wing-Tak Wong, Terry Bertin, Ming-Ming Jiang, Shan Chen, Zixue Jin, Oleg A. Shchelochkov, Lindsay C. Burrage, Anilkumar K. Reddy, Hong Jiang, Reem Abo-Zahrah, Shuangtao Ma, Ping Zhang, Karl-Dimiter Bissig, Jean J. Kim, Sridevi Devaraj, George G. Rodney, Ayelet Erez, Nathan S. Bryan, Sandesh C.S. Nagamani, and Brendan H. Lee**

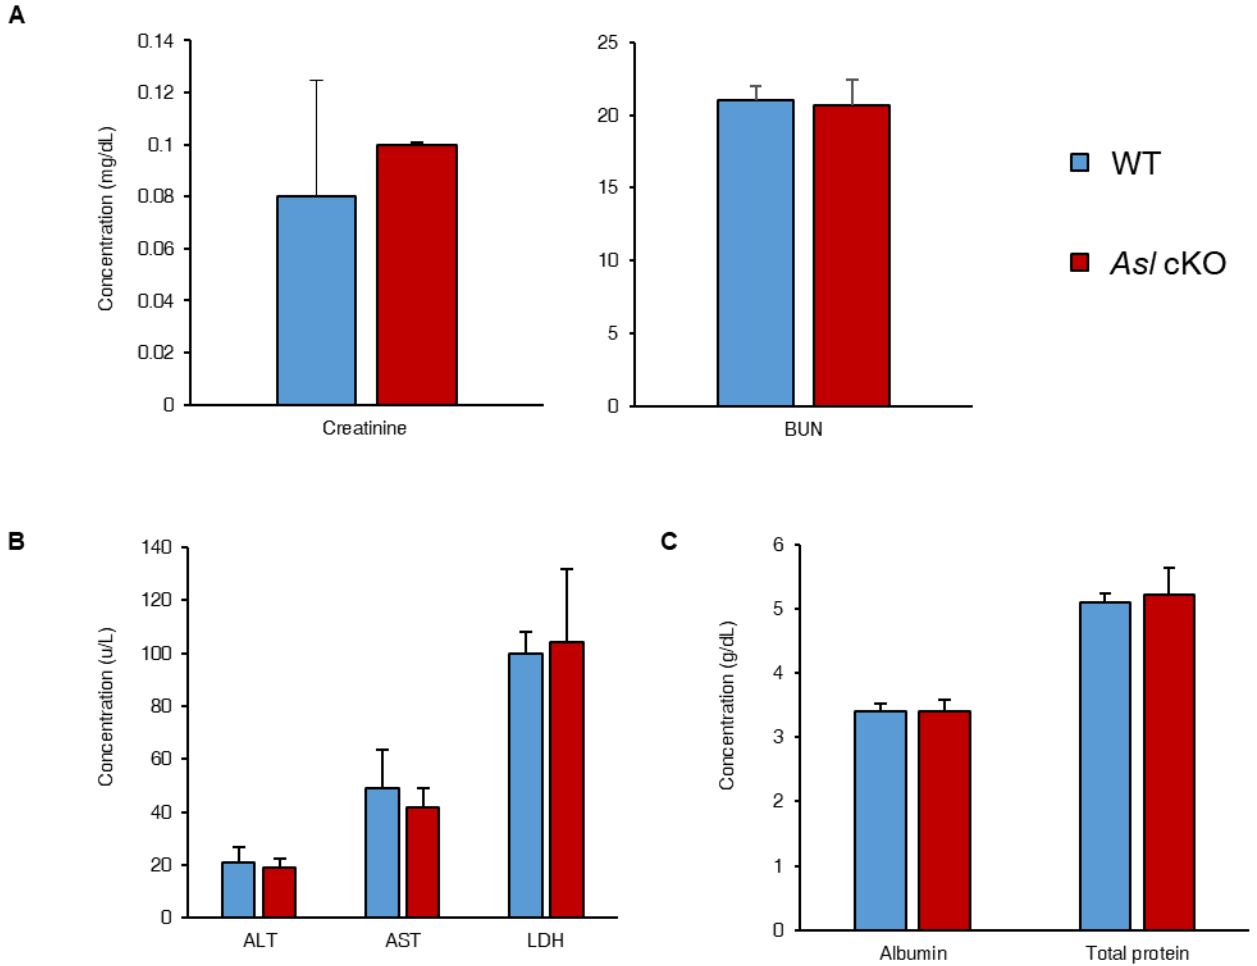

**Figure S1. *Asl* cKO mice display normal serum level of biomarkers for kidney and liver functions**

Serum level of (A) Creatinine, BUN, (B) ALT, AST, LDH, (C) albumin, and total protein in *Asl* cKO mice as compared to their wild-type littermates (n = 5, age = 12 weeks). Bar graphs represent mean values while error bars represent the standard deviation. Student's t-test.

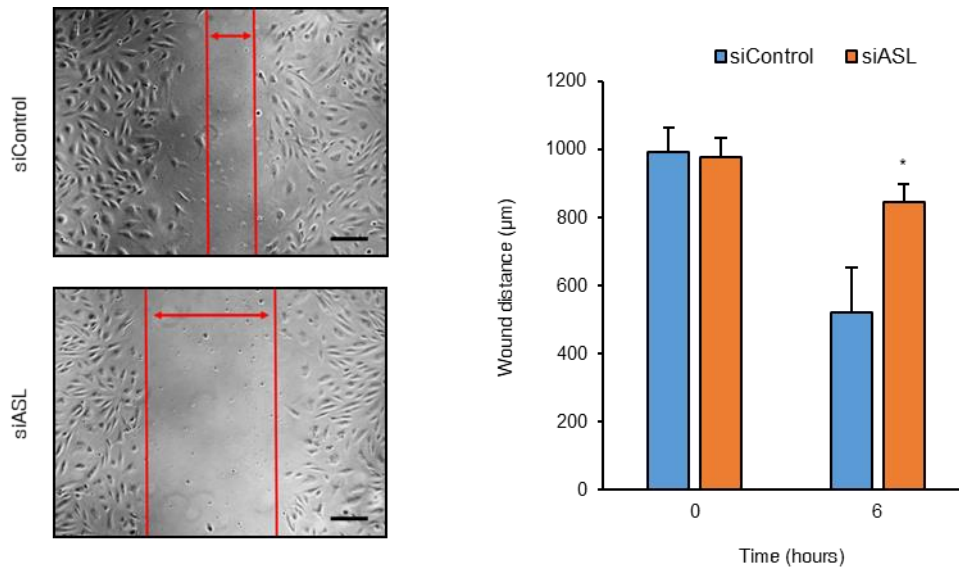

**Figure S2. Loss of ASL in HAECs impairs cell migration**

Wound healing assay performed on siASL-transfected HAECs. Wound distance was measured at t=0 h and t=8 h after wounding (n = 3). Scale bar, 200 µm. Bar graphs represent mean values while error bars represent the standard deviation. \*P<0.05. Student's t-test.

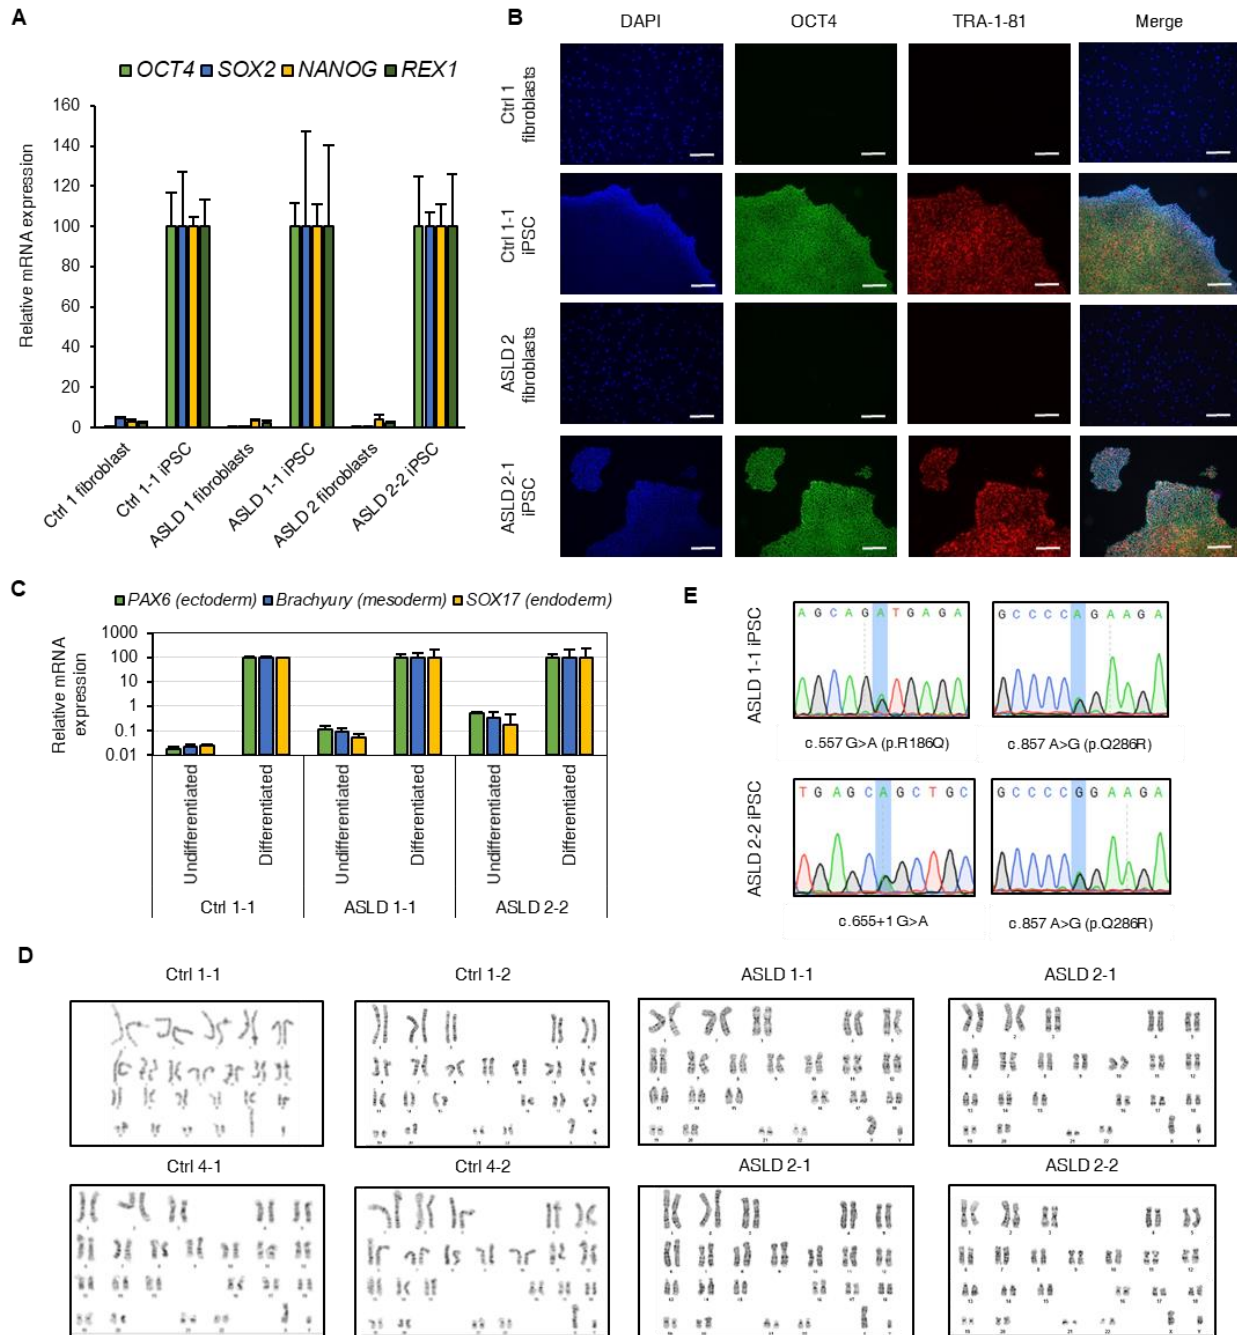

**Figure S3. Characterization of iPSC lines from healthy individuals and subjects with ASLD** (A) Relative mRNA expression of pluripotency markers in representative fibroblasts and iPSC lines ( $n = 3$ ). (B) Immunocytochemistry of pluripotency markers in representative control and ASLD iPSC lines. Scale bar, 200  $\mu\text{m}$ . (C) Relative mRNA expression of endodermal, mesodermal, and ectodermal markers in representative iPSC lines upon differentiation into each respective germ layer ( $n = 3$ ). (D) Karyotypes of control and ASLD iPSC lines. (E) Sanger sequencing showing that the ASLD iPSC lines continue to harbor the mutations present in the patient fibroblasts (GenBank: NM\_001024943.1). Error bars represent the standard deviation.

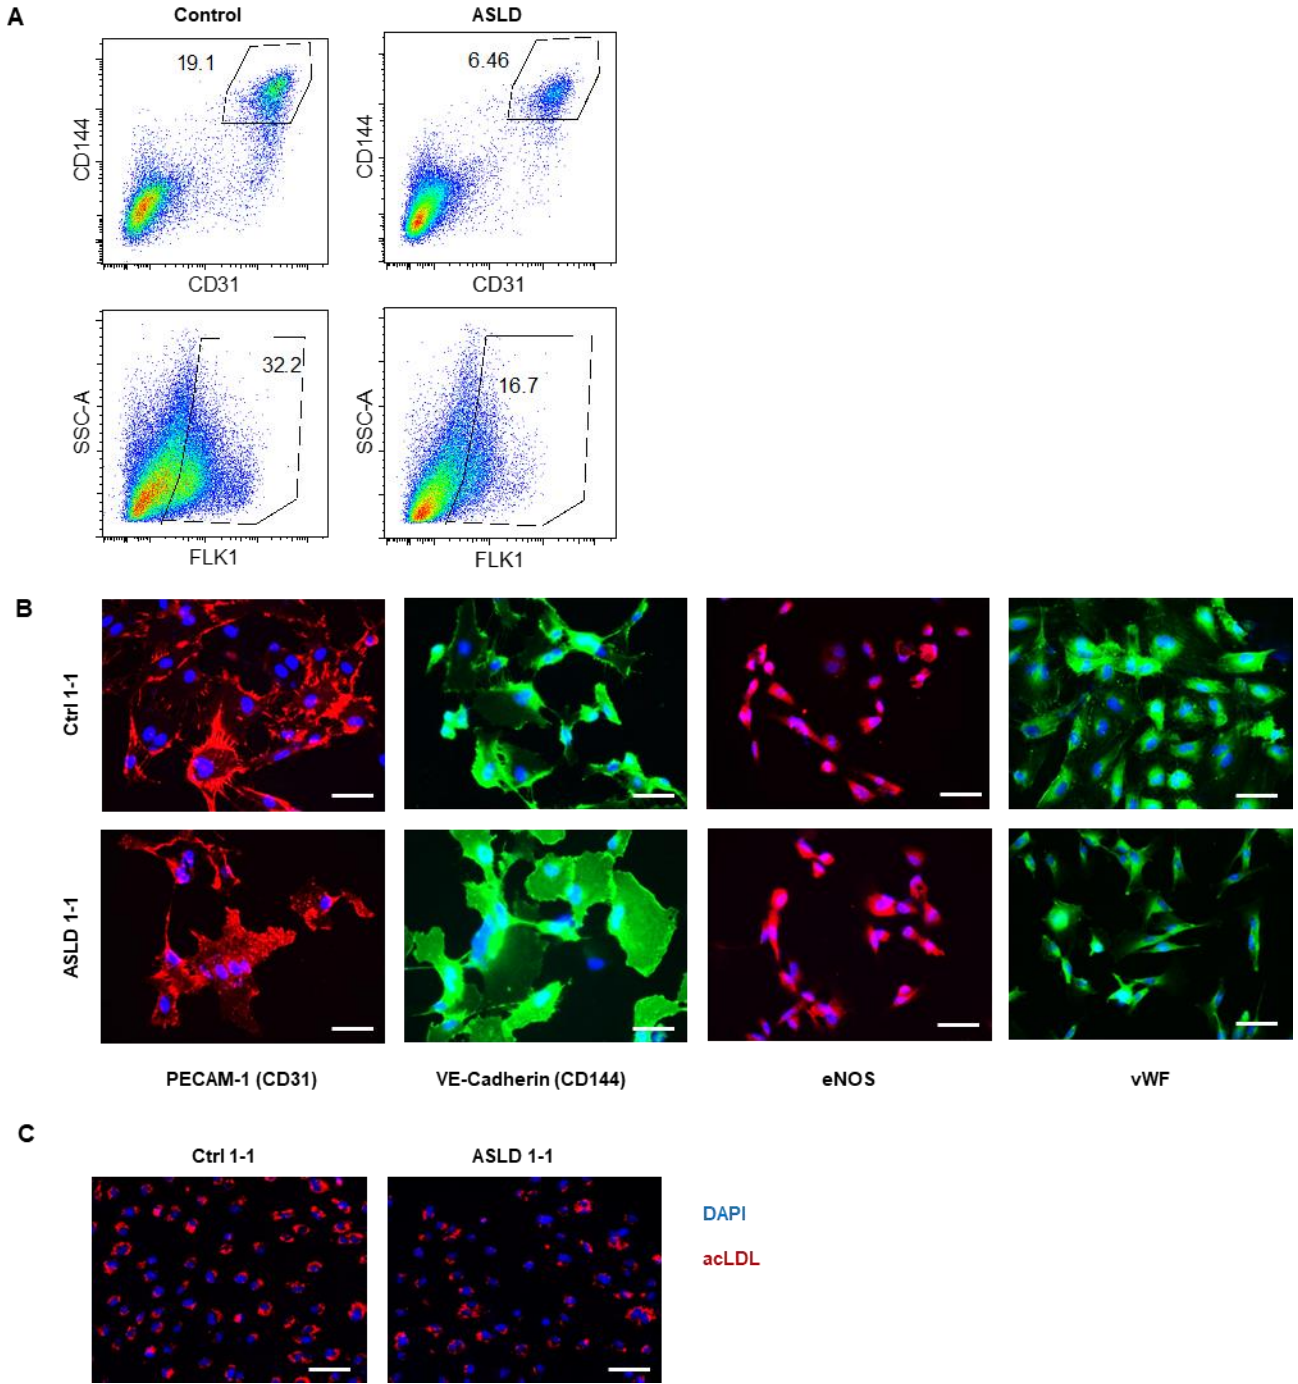

**Figure S4. Generation of hiPSC-derived endothelial cells**

(A) Representative FACS data obtained by sorting of CD31<sup>+</sup>/CD144<sup>+</sup> and Flk1<sup>+</sup> cells from differentiated control and ASLD iPSC. (B) Immunocytochemistry of endothelial markers in representative control and ASLD iPSC-ECs. Scale bar, 50  $\mu$ m. (C) Representative images of uptake of acetylated LDL (acLDL) by iPSC-ECs. Scale bar, 100  $\mu$ m.

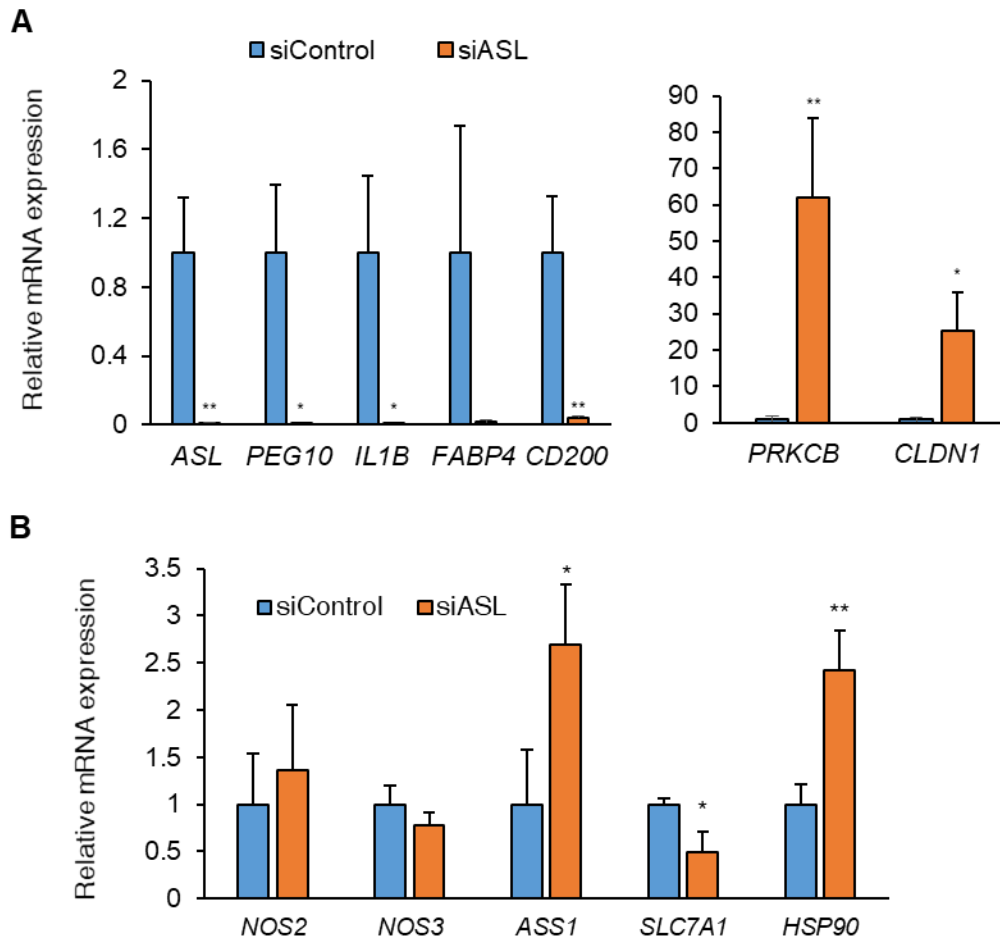

**Figure S5. qRT-PCR confirmation of RNA-Sequencing gene expression patterns in ASL-deficient HAECs**

The mRNA expression level of (A) top dysregulated and (B) NO synthesis complex genes in siASL-transfected HAECs were quantified by qRT-PCR (n = 3 biological replicates of siControl and siASL). *NOS1* expression in HAECs was undetectable by qRT-PCR. Bar graphs represent mean values while error bars represent the standard deviation. \*P<0.05 and \*\*P<0.01. Student's t-test.

| Subject | Age (years) | Sex | Height (cm) | Weight (kg) | BMI   |
|---------|-------------|-----|-------------|-------------|-------|
| 100006  | 13.8        | M   | 169         | 63          | 22.06 |
| 101893  | 13.0        | M   | 141         | 43          | 21.90 |
| 100551  | 4.5         | M   | 98          | 18          | 18.74 |
| 101880  | 10.1        | F   | 130         | 29          | 17.16 |
| 102635  | 9.1         | F   | 131         | 27          | 15.73 |
| 102747  | 11.2        | F   | 127         | 23          | 14.26 |
| 104591  | 13.4        | F   | 155         | 38          | 15.82 |
| 106088  | 13.8        | F   | 160         | 51          | 19.92 |

**Table S1. Demographic characteristics of individuals with ASLD enrolled in the trial NCT00345605**

| iPSC line | Sex  | Diagnosis       | Age at biopsy (years) | Pathogenic variants in ASL                 | Source of cells  | Method of iPSC derivation | Reprogramming factors   | Notes                                              |
|-----------|------|-----------------|-----------------------|--------------------------------------------|------------------|---------------------------|-------------------------|----------------------------------------------------|
| Ctrl1-1   | Male | Healthy control | 22                    | N/A                                        | Skin fibroblasts | Sendai virus              | OCT4, SOX2, KLF4, c-MYC | Provided by BCM-Human Stem Cell Core (HSCC-003iPS) |
| Ctrl1-2   |      |                 |                       |                                            |                  |                           |                         |                                                    |
| Ctrl 2    | Male | Healthy control | 61                    | N/A                                        | Skin fibroblasts | Gamma-retrovirus          | OCT4, SOX2, KLF4, c-MYC | N/A                                                |
| Ctrl 3    | Male | Healthy control | N/A                   | N/A                                        | Cord blood cells | Episomal vector           | OCT4, SOX2, KLF4, c-MYC | Purchased from Applied StemCell                    |
| Ctrl 4-1  | Male | Healthy control | 16                    | N/A                                        | Skin fibroblasts | Sendai virus              | OCT4, SOX2, KLF4, c-MYC | Provided by BCM-Human Stem Cell Core (HSCC-022iPS) |
| Ctrl 4-2  |      |                 |                       |                                            |                  |                           |                         |                                                    |
| ASLD 1-1  | Male | ASLD            | 16                    | c.557 G>A (p.R186Q)<br>c.857 A>G (p.Q286R) | Skin fibroblasts | Sendai virus              | OCT4, SOX2, KLF4, c-MYC | N/A                                                |
| ASLD 1-2  |      |                 |                       |                                            |                  |                           |                         |                                                    |
| ASLD 2-1  | Male | ASLD            | 10                    | c.655+1 G>A<br>c.857 A>G (p.Q286R)         | Skin fibroblasts | Sendai virus              | OCT4, SOX2, KLF4, c-MYC | N/A                                                |
| ASLD 2-2  |      |                 |                       |                                            |                  |                           |                         |                                                    |

**Table S2. List of iPSC lines and methods of derivation**



|                         | Gene       |                                                                   | FPKM      |        | log2(fold change) |
|-------------------------|------------|-------------------------------------------------------------------|-----------|--------|-------------------|
|                         |            |                                                                   | siControl | siASL  |                   |
| Top downregulated genes | SNORD116-4 | small nucleolar RNA, C/D box 116-4                                | 31.750    | 0      |                   |
|                         | LINC01173  | long intergenic non-protein coding RNA 1173                       | 0.773     | 0      |                   |
|                         | PEG10      | Paternally expressed 10                                           | 22.079    | 0.171  | -7.011            |
|                         | IL1B       | Interleukin-1 beta                                                | 22.901    | 0.533  | -5.425            |
|                         | CD200      | OX-2 membrane glycoprotein                                        | 14.678    | 0.463  | -4.988            |
|                         | ASL        | Argininosuccinate lyase                                           | 15.056    | 0.520  | -4.856            |
|                         | FABP4      | Fatty acid-binding protein, adipocyte                             | 16.898    | 0.610  | -4.793            |
|                         | GNG2       | Guanine nucleotide-binding protein G(I)/G(S)/G(O) subunit gamma-2 | 1.261     | 0.049  | -4.687            |
|                         | CEND1      | Cell cycle exit and neuronal differentiation protein 1            | 1.934     | 0.089  | -4.448            |
|                         | CORO1A     | Coronin-1A                                                        | 3.524     | 0.173  | -4.347            |
| Top upregulated genes   | KIAA1644   | Uncharacterized protein KIAA1644                                  | 0.059     | 1.641  | 4.794             |
|                         | PRKCB      | Protein kinase C beta type                                        | 0.017     | 0.433  | 4.633             |
|                         | CLDN1      | Claudin-1                                                         | 0.222     | 5.105  | 4.522             |
|                         | GHR        | Growth hormone receptor                                           | 0.034     | 0.485  | 3.839             |
|                         | PLSCR4     | Phospholipid scramblase 4                                         | 3.593     | 46.199 | 3.685             |
|                         | NTSR1      | Neurotensin receptor type 1                                       | 0.101     | 1.302  | 3.683             |
|                         | P2RY6      | P2Y purinoceptor 6                                                | 0.174     | 2.185  | 3.648             |
|                         | SRRM3      | Serine/arginine repetitive matrix protein 3                       | 0.059     | 0.736  | 3.631             |
|                         | SCN1B      | Sodium channel subunit beta-1                                     | 2.373     | 27.276 | 3.523             |
|                         | TGFB2      | Transforming growth factor beta-2                                 | 0.246     | 2.778  | 3.500             |

**Table S3. List of top dysregulated genes in ASL-deficient HAECs**

| Gene        |                                                 | FPKM      |         | log2(fold change) | Significant |
|-------------|-------------------------------------------------|-----------|---------|-------------------|-------------|
|             |                                                 | siControl | siASL   |                   |             |
| NOS1 (nNOS) | Nitric oxide synthase 1                         | 0.001     | 0.003   | 1.221             | no          |
| NOS2 (iNOS) | Nitric oxide synthase 2                         | 0         | 0.007   |                   | no          |
| NOS3 (eNOS) | Nitric oxide synthase 3                         | 33.186    | 33.496  | 0.013             | no          |
| ASS1        | Argininosuccinate synthase                      | 0.315     | 1.701   | 2.430             | yes         |
| SLC7A1      | High affinity cationic amino acid transporter 1 | 20.571    | 7.026   | -1.550            | yes         |
| HSP90AA1    | Heat shock protein HSP 90-alpha                 | 369.379   | 437.263 | 0.243             | yes         |

**Table S4. Effects of ASL deficiency on expression of components of NO synthesis complex in HAECs**
